# Supplementary material for: Transcriptional Profiling of Cultured, Embryonic Epicardial Cells Identifies Novel Genes and Signaling Pathways Regulated by TGFβR3 In Vitro
Source: PubMed Central journal article supplement (PMC4978490; doi:10.1371/journal.pone.0159710), 2016-08-09

**A**

| TGFβ1                                                |                                              |
|------------------------------------------------------|----------------------------------------------|
| <b>Adhesion</b>                                      |                                              |
| GO:0007155-cell adhesion                             | <i>Itgb1, Kira4, Fat2, Pkp1</i>              |
| GO:0022610-biological adhesion                       |                                              |
| <b>Bone and Cartilage Development</b>                |                                              |
| GO:0048705-skeletal system morphogenesis             | <i>Gas1, Dlx2, Tbx15, Tbx4, Wnt7a, Hoxa5</i> |
| GO:0048704-emb. skeletal system morphogenesis        |                                              |
| <b>Blood Vessel and Vasculature Development</b>      |                                              |
| GO:0001944-vasculature development                   | <i>Fgf2, Fgf10, Scg2, Sema5a</i>             |
| GO:0048514-blood vessel morphogenesis                |                                              |
| <b>Proliferation</b>                                 |                                              |
| GO:0008284-positive regulation of cell proliferation | <i>Cd80, Gli1, Ereg, Sp6, Clu</i>            |
| <b>Lung Development</b>                              |                                              |
| GO:0030324-lung development                          | <i>Tcf21, Id1, Hsd11b1, Foxp2, Mgp</i>       |
| GO:0060541-respiratory system development            |                                              |
| <b>ECM</b>                                           |                                              |
| GO:0043062-extracellular structure organization      | <i>Adamts14, Adamts20</i>                    |
| <b>Epithelial Development</b>                        |                                              |
| GO:0060429-epithelium development                    | <i>Irf6, Nkx2-3, Sfrp1, Id3</i>              |
| GO:0030855-epithelial cell differentiation           |                                              |
| <b>Brain Development</b>                             |                                              |
| GO:0030902-hindbrain development                     | <i>Phox2a, Smad9, Lhx5, Cacna1a</i>          |
| GO:0022037-metencephalon development                 |                                              |

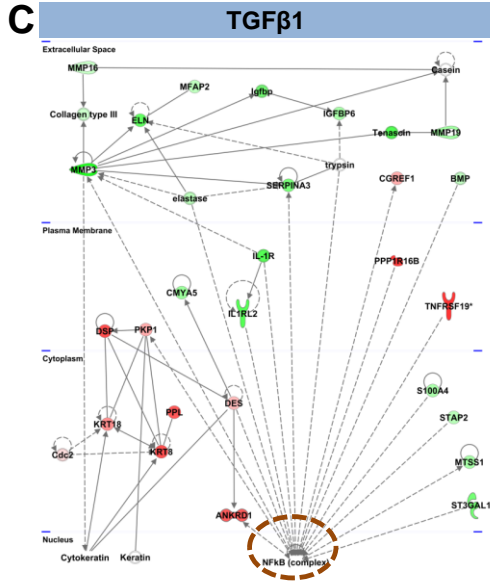

**B**

| VEH                                                  |                                                               |
|------------------------------------------------------|---------------------------------------------------------------|
| <b>Adhesion</b>                                      |                                                               |
| GO:0007155-cell adhesion                             | <i>Cadm1, Alcam1, CDH26, CDH13</i>                            |
| GO:0022610-biological adhesion                       |                                                               |
| GO:0016337-cell-cell adhesion                        |                                                               |
| <b>Bone and Cartilage Development</b>                |                                                               |
| GO:0048705-skeletal system morphogenesis             | <i>Bmpr1b, Hoxb2, Alx4, Prrx2, Wnt9a, Col11a1, Mgp, P2rx7</i> |
| GO:0001501-skeletal system development               |                                                               |
| GO:0051216-cartilage development                     |                                                               |
| GO:0048729-tissue morphogenesis                      |                                                               |
| GO:0048704-emb. skeletal system morphogenesis        |                                                               |
| GO:0048706-emb. skeletal system development          |                                                               |
| <b>Blood Vessel and Vasculature Development</b>      |                                                               |
| GO:0001568-blood vessel development                  | <i>Fgf8, Fgf9, Fgf10, Fgf18, Sema3c</i>                       |
| GO:0001944-vasculature development                   |                                                               |
| GO:0048514-blood vessel morphogenesis                |                                                               |
| GO:0001569-patterning of blood vessels               |                                                               |
| <b>Proliferation</b>                                 |                                                               |
| GO:0008284-positive regulation of cell proliferation | <i>Lif, Ccn2, Esr1, Nog, Hlx, Irf6</i>                        |
| GO:0042127-regulation of cell proliferation          |                                                               |
| GO:0008283-cell proliferation                        |                                                               |
| <b>ECM</b>                                           |                                                               |
| GO:0043062-extracellular structure organization      | <i>Col18a1, Tnc, Eln, Col5a3, Col4a3, Fbln5</i>               |
| GO:0030198-extracellular matrix organization         |                                                               |
| <b>Patterning</b>                                    |                                                               |
| GO:0001763-morphogenesis of a branching structure    | <i>Hoxb3, Hoxb4, Foxc2, Flt1, Wnt3, Tbx20</i>                 |
| GO:0007389-pattern specification process             |                                                               |
| GO:0003002-regionalization                           |                                                               |

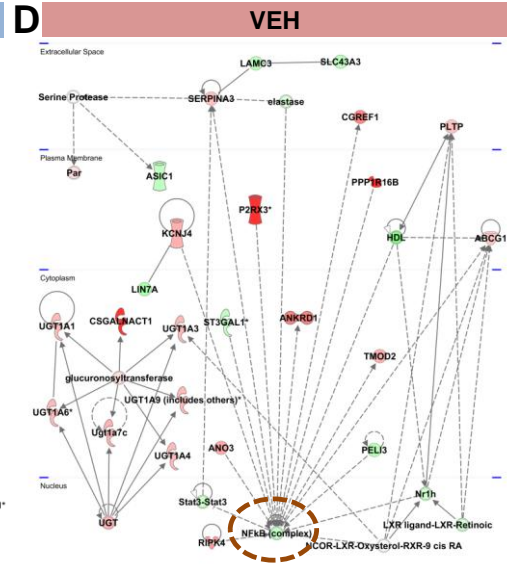

Supplement: pone.0159710.s004.pdf [file pone.0159710.s004.pdf]
