# Supplementary material for: Transcriptional Profiling of Cultured, Embryonic Epicardial Cells Identifies Novel Genes and Signaling Pathways Regulated by TGFβR3 In Vitro
Source: PubMed Central journal article supplement (PMC4978490; doi:10.1371/journal.pone.0159710), 2016-08-09

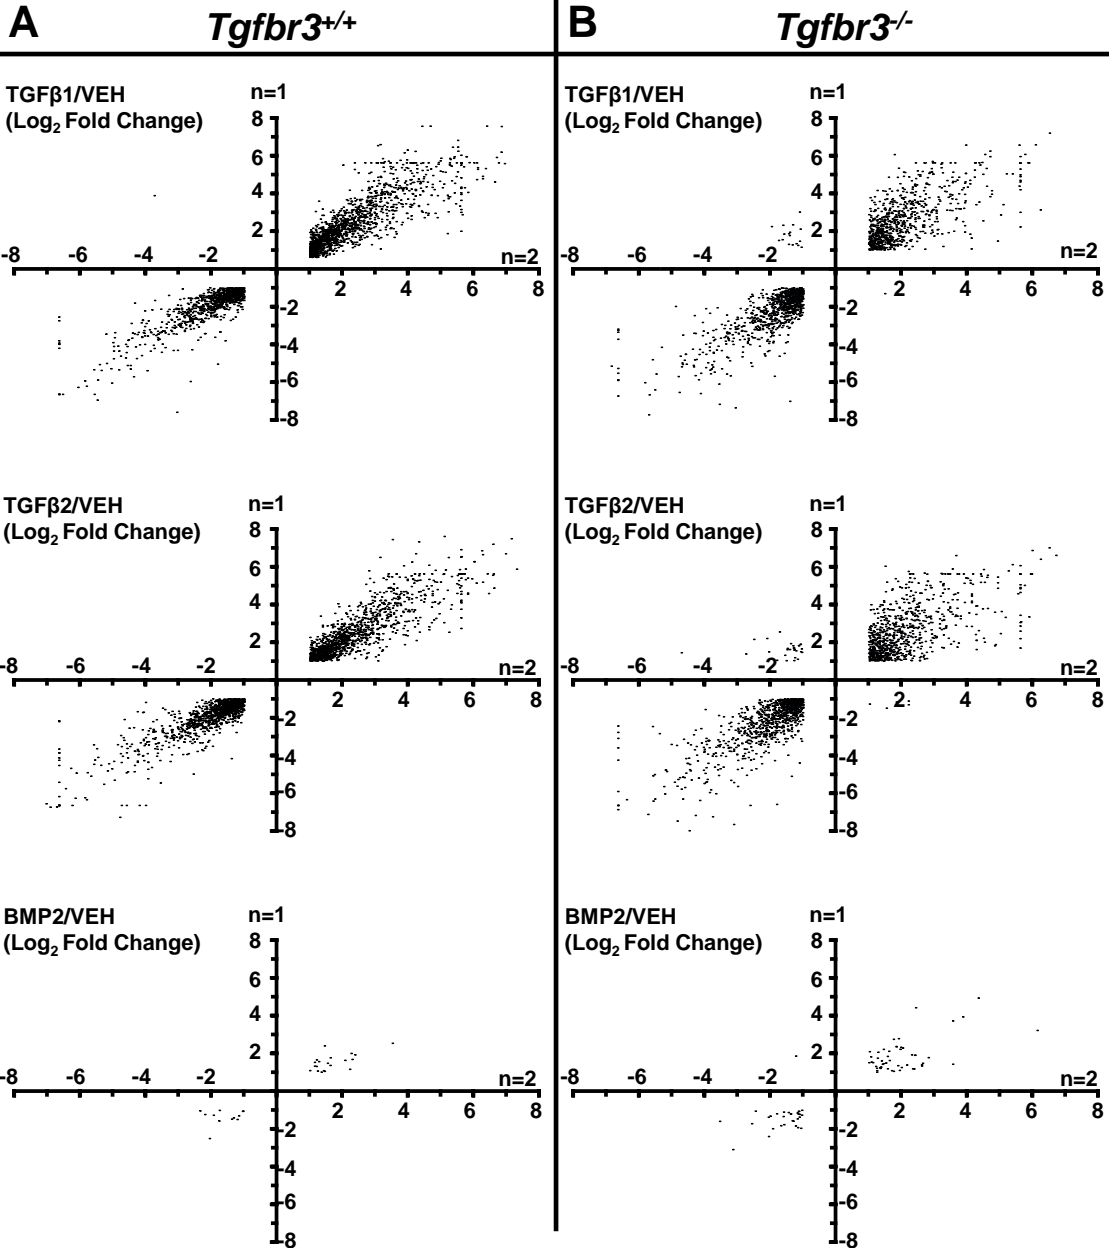

Supplement: pone.0159710.s002.pdf [file pone.0159710.s002.pdf]
