# Supplementary material for: Transcriptional Profiling of Cultured, Embryonic Epicardial Cells Identifies Novel Genes and Signaling Pathways Regulated by TGFβR3 In Vitro
Source: PubMed Central journal article supplement (PMC4978490; doi:10.1371/journal.pone.0159710), 2016-08-09

### A Vehicle

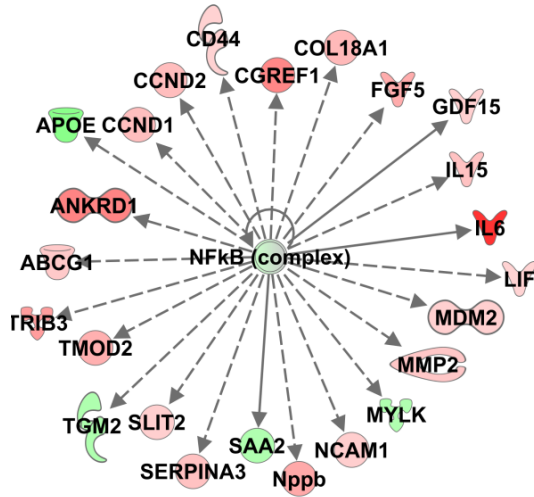

### B BMP2

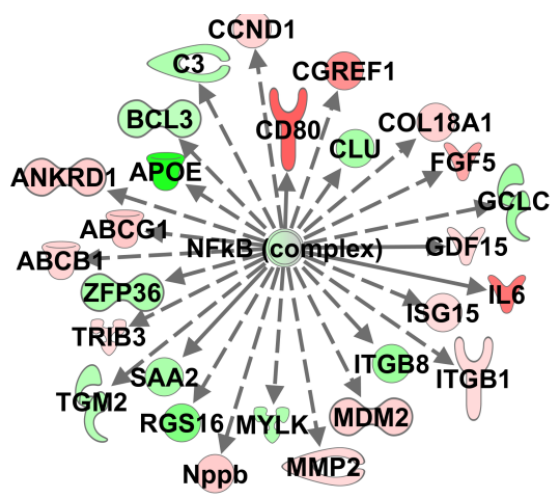

### C TGFβ1

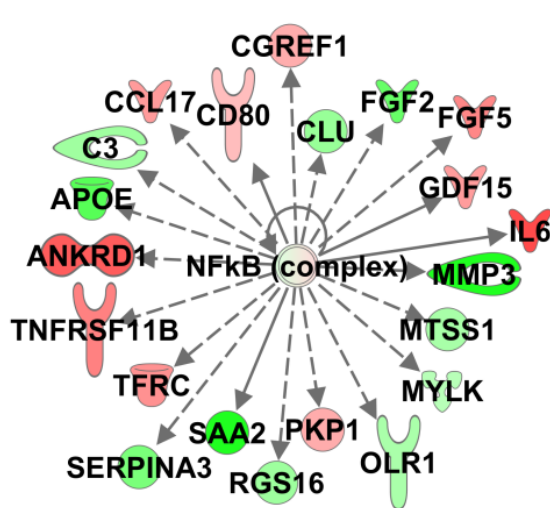

### D TGFβ2

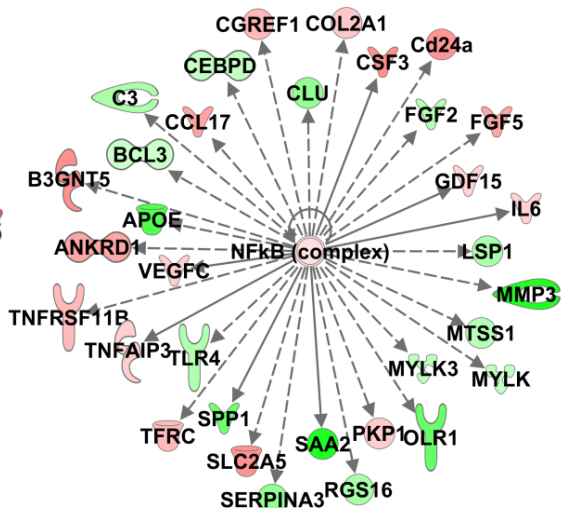

Supplement: pone.0159710.s005.pdf [file pone.0159710.s005.pdf]
