# Supplementary material for: Transcriptional Profiling of Cultured, Embryonic Epicardial Cells Identifies Novel Genes and Signaling Pathways Regulated by TGFβR3 In Vitro
Source: PLoS One. 2016 Aug 9;11(8):e0159710. doi: 10.1371/journal.pone.0159710 (PMC4978490; doi:10.1371/journal.pone.0159710)
Supplement: S2 Table — Genes identified as being >2-fold differentially regulated between Tgfbr3+/+ or Tgfbr3-/- epicardial cells incubated with TGFβ1. Genes listed in descending order of significance for each of 2 biological replicates. For each gene, p-value, location in cell, and function are listed. (XLSX) [file pone.0159710.s007.xlsx]

## Sheet: Table S2
TABLE S2: Genes >2-fold dysregulated between Tgfbr3+/+ and Tgfbr3-/- epicardial cells after TGFβ1 incubation
	n=1		n=2
Gene Symbol	Fold Change (Tgfbr3-/- / Tgfbr3+/+)	p-value	Fold Change (Tgfbr3-/- / Tgfbr3+/+)	p-value	Location in Cell	Function
Rprl2	999	4.83e-15	999	1.41e-29	unknown	other
TSIX	999	0	999	2.65e-73	Nucleus	other
XIST	999	0	999	0	Nucleus	other
Rprl3	999	9.59e-35	164.741	3.99e-45	unknown	other
Ly6a (includes others)	999	4.33e-14	36.75	7.69e-10	Plasma Membrane	other
TMEM117	999	1.65e-05	11.405	2.5e-05	Cytoplasm	other
Klra4 (includes others)	999	0.000307	5.069	1.55e-17	Plasma Membrane	transmembrane receptor
CTNND2	49.699	2.14e-168	27.034	6.68e-111	Plasma Membrane	other
RIMS2	49.4	3.59e-65	45.198	3.2e-34	Plasma Membrane	other
ALX4	34.515	6.97e-27	38.651	1.18e-19	Nucleus	transcription regulator
9030619P08Rik	31.28	9.71e-09	27.879	1.85e-07	unknown	other
LCE1B	30.201	1.95e-08	41.819	3.28e-11	unknown	other
Lce1f	28.583	8.96e-29	3.661	0.000334	unknown	other
FGF10	26.606	3.24e-20	10.138	1.63e-06	Extracellular Space	growth factor
FRMPD1	17.617	8.94e-13	12.672	3.34e-13	Cytoplasm	other
FAM134B	14.561	3.16e-07	3.548	0.000248	Cytoplasm	other
KCNK1	13.584	2.37e-89	3.591	5.38e-20	Plasma Membrane	ion channel
BCAT1	12.258	2.15e-152	7.292	8.76e-63	Cytoplasm	enzyme
EPB41L3	12.188	2.98e-25	8.11	4.37e-14	Plasma Membrane	other
Lce1h	11.942	6.67e-34	5.974	1.92e-12	unknown	other
NECAB1	11.865	1.67e-10	999	1.81e-06	Cytoplasm	other
MEIG1	11.865	6.37e-36	4.365	1.98e-05	Nucleus	other
Xlr3c (includes others)	11.657	8.82e-60	7.477	1.27e-12	Nucleus	other
9330179D12Rik	11.428	0	27.764	1.76e-70	unknown	other
IL17RE	10.067	2.26e-12	7.603	2.97e-08	unknown	other
TLL1	9.707	1.75e-06	5.386	0.000677	Extracellular Space	peptidase
Lce1g	9.268	1.5e-45	5.875	2.71e-18	unknown	other
SYCE1	8.557	2.72e-23	8.755	5.06e-17	Nucleus	other
BMPR1B	8.269	4.72e-18	6.618	9.64e-10	Plasma Membrane	kinase
TBX4	8.224	2.23e-12	30.414	3.88e-08	Nucleus	transcription regulator
Klra18	7.989	5.63e-79	5.295	1.91e-19	Plasma Membrane	other
TMEM132C	7.55	2.33e-07	4.526	0.000104	unknown	other
FAXC	7.38	1.16e-23	6.803	7.33e-20	unknown	other
WNT7A	7.21	6.95e-23	5.146	1.25e-21	Extracellular Space	cytokine
LIMCH1	6.791	6.36e-302	6.193	8.48e-126	unknown	other
NKX2-3	6.741	1.68e-09	16.474	6.77e-08	Nucleus	transcription regulator
TNFRSF19	6.741	2.5e-05	5.829	4.49e-05	Plasma Membrane	transmembrane receptor
Apol10a (includes others)	6.741	2.5e-05	3.226	0.000522	unknown	other
PPP1R16B	6.487	2.81e-68	5.155	2.03e-28	Plasma Membrane	phosphatase
B4GALNT2	6.464	4.11e-133	4.981	6.49e-43	Cytoplasm	enzyme
NPR2	6.377	2.13e-274	6.094	9.62e-217	Plasma Membrane	G-protein coupled receptor
PIANP	6.366	1.65e-39	8.617	3.2e-22	unknown	other
HMHA1	6.341	6.8e-55	8.717	7.17e-48	Cytoplasm	transporter
PTPRB	6.202	1.17e-185	4.755	3.62e-110	Plasma Membrane	phosphatase
SNRPN	6.112	3.34e-09	3.687	6.28e-05	Nucleus	other
FAM89A	6.091	3.8e-16	4.845	8.86e-11	unknown	other
IL6	5.96	3.59e-82	2.851	1.1e-17	Extracellular Space	cytokine
DSP	5.88	1.21e-177	4.413	5.46e-94	Plasma Membrane	other
KRT8	5.851	7.55e-34	2.837	1.73e-17	Cytoplasm	other
WASF3	5.808	8.13e-12	6.517	1.07e-07	Cytoplasm	other
SEMA3G	5.528	3.19e-13	2.453	2.94e-05	unknown	other
PPL	5.521	6.1e-131	7.001	1.71e-145	Cytoplasm	other
PRDM6	5.494	3.24e-79	4.193	6.87e-41	Nucleus	other
ANKRD1	5.402	0	4.419	0	Cytoplasm	transcription regulator
C6orf132	5.393	5.02e-12	5.76	1.5e-09	unknown	other
SNURF	5.285	3.35e-08	4.119	2.98e-06	Nucleus	other
MANSC1	5.285	3.35e-08	3.96	0.000255	unknown	other
Msx3	5.197	1.11e-08	5.449	3.92e-08	Nucleus	transcription regulator
BTBD11	5.162	1.36e-10	6.59	6.41e-06	Nucleus	transcription regulator
MAB21L2	5.137	1.74e-129	3.723	3.73e-49	Nucleus	other
Masp1	5.132	6.97e-23	4.239	6.4e-14	Extracellular Space	peptidase
ANGPTL4	5.122	3.63e-262	5.776	1.67e-173	Extracellular Space	other
CDKN1C	5.109	0	2.783	9.41e-170	Nucleus	other
RUNX1T1	5.103	3.59e-18	19.262	1.33e-21	Nucleus	transcription regulator
Snhg9	5.076	3.31e-66	3.189	2.22e-38	unknown	other
SEMA7A	4.974	1.7e-12	3.327	7.52e-10	Plasma Membrane	other
DUOXA1	4.777	2.06e-09	4.224	0.000777	Plasma Membrane	other
FAM43B	4.746	2.93e-21	7.181	2.98e-17	unknown	other
CTSC	4.741	1.07e-52	2.718	9.01e-13	Cytoplasm	peptidase
FSTL3	4.56	1.7e-116	3.604	5.13e-51	Extracellular Space	other
GAP43	4.514	2.11e-15	2.479	0.000263	Plasma Membrane	other
RPH3A	4.494	0.000241	6.336	0.0008	Plasma Membrane	transporter
SOX21	4.469	1.72e-08	10.56	7.97e-07	Nucleus	transcription regulator
CHST7	4.469	7.65e-05	8.871	0.000436	Cytoplasm	enzyme
COL4A3	4.433	7.27e-38	3.268	7.25e-16	Extracellular Space	other
GALNT9	4.314	4.15e-05	8.871	0.000436	Cytoplasm	enzyme
RNF152	4.243	3.6e-22	2.226	7.09e-05	Cytoplasm	enzyme
CKMT1A/CKMT1B	4.239	1.16e-99	3.962	3.8e-43	Cytoplasm	kinase
GATM	4.229	3.84e-195	2.552	4.2e-32	Cytoplasm	enzyme
GALNTL4	4.215	6.32e-41	2.63	2.07e-11	Cytoplasm	enzyme
C1orf115	4.213	5.95e-45	2.186	1.29e-07	unknown	other
TLR5	4.201	5.29e-10	4.345	0.000187	Plasma Membrane	transmembrane receptor
IL28RA	4.195	2.24e-05	7.603	6.8e-06	Plasma Membrane	transmembrane receptor
BCL11B	4.18	6.99e-05	8.237	0.000878	Nucleus	other
TNFRSF11B	4.179	3.65e-150	2.06	1.18e-22	Plasma Membrane	transmembrane receptor
PARVB	4.16	0.000219	8.237	0.000878	Cytoplasm	other
AASS	4.118	3.93e-06	6.59	6.41e-06	Cytoplasm	enzyme
NPR3	4.118	2.26e-25	3.135	3.37e-10	Plasma Membrane	G-protein coupled receptor
PP2D1	4.099	1.21e-05	4.526	0.000104	unknown	phosphatase
CSGALNACT1	4.006	2.18e-70	5.176	3.54e-45	Cytoplasm	enzyme
FGF5	3.983	1.8e-38	2.792	8.45e-12	Extracellular Space	growth factor
PCOLCE2	3.961	4.8e-26	3.485	6.61e-12	Extracellular Space	other
ZDHHC2	3.919	7.26e-68	3.615	6.46e-48	Nucleus	enzyme
FZD10	3.768	1.1e-81	5.659	4.07e-95	Plasma Membrane	G-protein coupled receptor
SLC4A4	3.768	7.61e-144	3.87	1.21e-94	Plasma Membrane	transporter
DKKL1	3.761	1.05e-58	2.212	2.62e-11	Extracellular Space	other
PM20D1	3.752	9.41e-10	5.654	4.01e-20	unknown	peptidase
TUBA8	3.739	3.09e-12	3.078	1.33e-07	Cytoplasm	other
ST8SIA2	3.73	5.11e-10	2.197	0.000458	Cytoplasm	enzyme
KRT18	3.726	2.82e-09	3.301	1.45e-12	Cytoplasm	other
CXXC4	3.712	1.05e-16	2.047	4.23e-07	Cytoplasm	other
2410124H12Rik	3.708	1.97e-18	2.464	2.77e-08	unknown	other
AMN	3.706	4.45e-182	2.851	2.76e-51	Plasma Membrane	other
CPNE7	3.699	1.14e-53	5.094	2.92e-61	unknown	transporter
TFRC	3.631	2.73e-39	3.548	1.54e-28	Plasma Membrane	transporter
TSPAN12	3.544	5.32e-24	2.002	9.58e-05	Plasma Membrane	transmembrane receptor
C4orf32	3.505	1.6e-11	2.112	9.52e-05	unknown	other
KCNS3	3.481	3.1e-08	3.341	3.04e-07	Plasma Membrane	ion channel
PLD5	3.435	1.05e-56	2.661	1.55e-18	unknown	other
SOX13	3.431	7.47e-43	3.328	1.09e-33	Nucleus	transcription regulator
KIAA1467	3.419	3.86e-85	3.753	1.27e-53	unknown	other
DUOX1	3.407	1.65e-14	3.251	3.74e-07	Plasma Membrane	enzyme
RBM20	3.405	1.32e-31	4.299	5.94e-24	unknown	other
HECW2	3.399	4.29e-17	4.37	1.17e-14	Extracellular Space	enzyme
BAI1	3.321	1.05e-162	3.175	5.41e-68	Plasma Membrane	G-protein coupled receptor
CCL17	3.313	5.4e-21	2.492	2.71e-09	Extracellular Space	cytokine
ACSBG1	3.293	1.02e-37	3.415	1.86e-21	Cytoplasm	enzyme
POU4F3	3.287	3.71e-07	3.564	2.98e-06	Nucleus	transcription regulator
LTBP1	3.283	3.16e-222	2.554	6e-73	Extracellular Space	other
GDF15	3.282	7.24e-27	2.023	9.74e-06	Extracellular Space	growth factor
Usp44	3.279	3.09e-08	4.345	0.000187	Nucleus	peptidase
Pde4d	3.277	1.66e-08	3.363	2.02e-08	Cytoplasm	enzyme
AGPAT9	3.271	7.55e-10	5.069	9.38e-10	Cytoplasm	enzyme
AMPD3	3.236	0.000618	16.474	0.000186	Cytoplasm	enzyme
PEX5L	3.236	4.87e-08	5.424	3.44e-18	Cytoplasm	ion channel
Fndc3c1	3.172	1.14e-05	5.227	2.23e-06	unknown	other
MEIS3	3.161	1.41e-19	3.012	2.79e-14	Nucleus	transcription regulator
GJB3	3.101	3.35e-05	3.056	4.73e-05	Plasma Membrane	transporter
ST6GAL1	3.086	2.45e-37	3.316	6.04e-26	Cytoplasm	enzyme
Rasl2-9	3.076	3.06e-14	2.379	6.46e-09	Nucleus	transporter
CMAHP	3.074	4.24e-06	4.277	8.11e-05	Cytoplasm	enzyme
DSCAML1	3.025	2.64e-51	3.003	2.67e-22	Plasma Membrane	other
FERMT1	2.992	1.93e-45	2.158	8.09e-15	Plasma Membrane	other
Gm3230	2.948	7.55e-08	3.802	3.63e-05	unknown	other
KIF1A	2.921	2.01e-06	4.045	1.16e-11	Cytoplasm	other
NDUFA4L2	2.913	6.34e-88	4.688	1.02e-59	unknown	enzyme
KRT80	2.902	4.03e-10	3.802	1.05e-15	unknown	other
RASGEF1A	2.884	8.16e-11	2.876	2.71e-06	unknown	other
CORO2A	2.878	7.33e-145	2.512	2.7e-85	Cytoplasm	other
ITGA2	2.876	3.09e-06	5.914	2.4e-08	Plasma Membrane	other
POU3F3	2.876	7.38e-07	4.254	1.87e-07	Nucleus	transcription regulator
B4GALNT1	2.866	1.68e-22	2.125	9.35e-07	Cytoplasm	enzyme
DGKI	2.851	0.000448	7.287	1.34e-05	Cytoplasm	kinase
MAP2	2.851	4.17e-40	2.064	9.9e-11	Cytoplasm	other
GRM8	2.844	5.17e-43	2.017	3.14e-08	Plasma Membrane	G-protein coupled receptor
TMEFF2	2.841	2.65e-63	2.505	2.96e-30	Plasma Membrane	other
FOXL1	2.804	3.71e-05	7.422	3.93e-09	Nucleus	transcription regulator
ALOX12	2.804	4.43e-08	5.28	4.47e-09	Cytoplasm	enzyme
DLX2	2.796	1.71e-06	4.582	7.4e-08	Nucleus	transcription regulator
NFATC1	2.787	2.76e-63	3.586	1.52e-64	Nucleus	transcription regulator
EGFL8	2.784	4.1e-279	2.215	3.13e-42	Extracellular Space	other
ETNK2	2.782	6.96e-18	3.379	4.66e-12	unknown	kinase
SLC7A5	2.765	0	2.477	9.95E-321	Plasma Membrane	transporter
MAP7	2.764	2.93e-10	2.835	2.41e-08	Cytoplasm	other
NRIP3	2.75	5.65e-05	2.987	0.000329	unknown	other
PKP1	2.736	8.99e-09	3.168	4.55e-07	Plasma Membrane	other
KCNC3	2.724	1.45e-144	3.421	1.18e-159	Plasma Membrane	ion channel
CGREF1	2.715	2.78e-224	2.313	1.2e-85	Extracellular Space	other
C10orf47	2.71	3.03e-08	2.566	4.5e-07	unknown	other
PRKAA2	2.706	1.89e-97	2.006	1.18e-20	Cytoplasm	kinase
D730039F16Rik	2.695	8.25e-58	2.341	4.25e-20	unknown	other
PLCXD2	2.685	1.36e-85	3.52	1.75e-71	unknown	enzyme
OLFM2	2.68	5.14e-07	2.827	1.76e-08	Cytoplasm	other
Serpina3h	2.662	2.71e-09	2.136	0.000288	Extracellular Space	other
FAM159B	2.659	4.67e-88	3.159	1.31e-34	unknown	other
BC106179	2.65	3.42e-07	3.571	0.000108	unknown	other
SORCS2	2.633	1.29e-20	2.467	4.83e-23	Plasma Membrane	transporter
LHX5	2.615	4.47e-34	3.356	1.87e-20	Nucleus	transcription regulator
Tnfrsf26	2.61	4.03e-176	2.091	1.03e-32	unknown	other
LOXL4	2.577	6.16e-07	2.678	8.12e-10	Extracellular Space	enzyme
LMO7	2.546	4.73e-20	3.168	2.26e-19	Cytoplasm	enzyme
CPE	2.501	6.62e-300	2.207	1.66e-224	Plasma Membrane	peptidase
MAP3K13	2.5	8.08e-11	2.001	3.17e-05	Cytoplasm	kinase
GLIS3	2.487	8.42e-34	2	6.94e-11	Nucleus	transcription regulator
TEX15	2.481	4.19e-35	2.281	1.06e-14	Extracellular Space	other
C21orf7	2.478	8.9e-30	2.019	1.72e-05	unknown	other
ADRA1B	2.474	1.81e-08	5.153	7.6e-20	Plasma Membrane	G-protein coupled receptor
MATN4	2.468	1.2e-230	2.341	1.79e-99	Extracellular Space	other
WSCD1	2.448	7.85e-05	3.881	3.44e-07	unknown	other
RAB37	2.441	5.11e-09	3.802	2.62e-07	Cytoplasm	enzyme
VCAN	2.422	6.91e-95	2.199	4.48e-57	Extracellular Space	other
Foxl2os	2.415	2.35e-07	4.478	1.48e-08	unknown	other
IRF6	2.398	1.23e-15	2.811	2.95e-11	Nucleus	transcription regulator
DPF1	2.395	7.03e-09	4.971	2.02e-16	Nucleus	other
NFATC2	2.385	2.45e-27	3.832	1.08e-30	Nucleus	transcription regulator
SH2D4A	2.385	2.45e-27	3.197	4.17e-17	Cytoplasm	other
FOSB	2.383	1.59e-14	2.882	9.47e-21	Nucleus	transcription regulator
CNTFR	2.357	0.000134	2.04	0.000268	Plasma Membrane	transmembrane receptor
IGF2BP3	2.348	1.2e-27	2.182	4.23e-10	Cytoplasm	translation regulator
NPAS1	2.33	0.000304	3.717	2.32e-06	Nucleus	transcription regulator
SDC3	2.33	1.17e-58	2.287	2.85e-43	Plasma Membrane	other
LPL	2.317	8.99e-57	3.05	4.07e-21	Cytoplasm	enzyme
C16orf74	2.317	9.33e-11	3.02	2.17e-11	unknown	other
SLC22A15	2.307	1.86e-05	2.534	0.000123	unknown	transporter
SLC7A3	2.289	8.74e-27	2.503	1.03e-22	Plasma Membrane	transporter
Rps19-ps3	2.284	2.74e-109	2.671	8.23e-138	unknown	other
ARTN	2.254	2.54e-13	3.111	6.66e-09	Extracellular Space	growth factor
ARHGAP8/PRR5-ARHGAP8	2.254	2.38e-07	2.316	0.000194	Cytoplasm	other
KDM6A	2.247	5.82e-48	2.137	3.85e-21	Nucleus	other
DES	2.246	1.54e-34	2.864	8.41e-43	Cytoplasm	other
UBA6	2.245	3.05e-05	4.888	3.12e-05	Cytoplasm	enzyme
PRDM16	2.241	1.81e-09	3.337	2.25e-09	Nucleus	transcription regulator
REM1	2.232	9.58e-15	2.805	2.88e-12	unknown	enzyme
PPP2R2C	2.229	3e-55	2.765	4.83e-62	unknown	phosphatase
ITGA6	2.224	1.61e-48	2.2	4.36e-18	Plasma Membrane	other
COX7A1	2.223	3.23e-18	3.324	1.86e-17	Cytoplasm	enzyme
RANGRF	2.213	3.44e-13	2.046	2.05e-08	Plasma Membrane	other
PTP4A1	2.204	1.85e-172	3.358	9.21e-07	Cytoplasm	phosphatase
FOXL2	2.204	1.43e-10	3.255	3.08e-14	Nucleus	transcription regulator
CCDC73	2.199	4.62e-14	2.601	0.000412	unknown	other
CD80	2.192	9.58e-17	4.647	1.09e-13	Plasma Membrane	transmembrane receptor
PRSS56	2.191	1.06e-10	3.309	8.45e-11	unknown	other
FAT2	2.19	0.00015	4.971	6.88e-09	Plasma Membrane	other
RNF11	2.189	9.48e-15	2.089	3.51e-07	Nucleus	other
DUS2L	2.188	9.6e-05	2.253	0.000555	Cytoplasm	other
TMEM37	2.181	1.26e-56	2.037	9.22e-17	Plasma Membrane	ion channel
HCK	2.173	4.54e-08	2.379	4.65e-07	Cytoplasm	kinase
CYCS	2.16	4.04e-35	2.103	4.76e-26	Cytoplasm	transporter
BCAP29	2.157	4.09e-16	4.055	3.46e-21	Cytoplasm	transporter
TBX15	2.157	2.67e-08	2.263	1.43e-05	Nucleus	transcription regulator
SP6	2.142	5.79e-64	3.088	3.36e-82	Nucleus	transcription regulator
ARHGAP22	2.138	1.86e-06	2.255	3.9e-08	Cytoplasm	other
THBD	2.132	9.64e-28	2.735	2.07e-21	Plasma Membrane	transmembrane receptor
FLT1	2.12	2.82e-19	2.791	2.72e-15	Plasma Membrane	kinase
BOK	2.115	1.85e-23	2.313	1.08e-19	Cytoplasm	other
EREG	2.106	4.59e-36	2.123	2.49e-20	Extracellular Space	growth factor
TM4SF1	2.103	5.56e-15	2.816	9.8e-13	Plasma Membrane	other
MFAP3L	2.101	2.83e-11	2.712	1.35e-09	unknown	other
HOXA5	2.097	0.000214	2.655	0.000136	Nucleus	transcription regulator
Gm15645	2.092	1.35e-05	3.881	3.44e-07	unknown	other
RAP1GAP2	2.079	2.75e-17	2.624	1.09e-22	Cytoplasm	other
APOO	2.076	2.7e-12	2.387	2.11e-08	Extracellular Space	other
FRMD4B	2.065	1.73e-18	2.432	4.05e-21	Cytoplasm	other
4833438C02Rik	2.046	8.19e-52	2.802	2.54e-51	unknown	other
CILP2	2.037	3.93e-18	2.98	1.28e-27	Extracellular Space	other
4921504A21Rik	2.008	2.35e-08	2.778	6.87e-06	unknown	other
IGFBP6	-2.008	9.16e-12	-3.333	8.6e-79	Extracellular Space	other
CTSW	-2.009	5.45e-19	-2.288	3.85e-54	Cytoplasm	peptidase
GPSM3	-2.014	2.72e-06	-2.06	9.79e-16	Cytoplasm	other
LTBP4	-2.014	5.08e-84	-2.335	2.56e-194	Extracellular Space	growth factor
NUP210	-2.014	4.93e-12	-2.665	3.99e-27	Nucleus	transporter
SERPING1	-2.016	3.17e-105	-3.498	0	Extracellular Space	other
SNX32	-2.019	2.22e-09	-2.183	3.83e-21	unknown	other
MAF	-2.027	1.63e-29	-2.274	6.93e-121	Nucleus	transcription regulator
SYNE2	-2.028	1.54e-234	-2.002	0	Nucleus	other
AHR	-2.033	6.14e-96	-2.795	0	Nucleus	ligand-dependent nuclear receptor
MGAT3	-2.033	6.42e-06	-2.922	4.16e-19	Cytoplasm	enzyme
ENTPD4	-2.033	5.6e-35	-3.022	4.99e-45	Cytoplasm	enzyme
GPR68	-2.033	0.000345	-3.075	9.44e-12	Plasma Membrane	G-protein coupled receptor
BPHL	-2.036	0.000505	-2.183	5.28e-11	Cytoplasm	enzyme
Gbp4	-2.037	3.22e-06	-2.4	2.27e-27	unknown	enzyme
1010001N08Rik	-2.049	1.7e-06	-2.552	1.19e-38	unknown	other
PHACTR2	-2.05	1.08e-09	-2.595	7.06e-33	unknown	other
MMP19	-2.056	9.21e-09	-3.658	8.11e-75	Extracellular Space	peptidase
CCDC125	-2.057	0.000785	-2.343	3.27e-13	unknown	other
PAQR8	-2.065	6.56e-07	-2.04	1.74e-20	Plasma Membrane	other
E130310I04Rik	-2.068	0.000565	-3.245	1.26e-15	unknown	other
RGL3	-2.07	4.77e-07	-2.186	3e-11	Cytoplasm	other
PLEKHF1	-2.079	7.47e-17	-3.238	9.69e-78	Cytoplasm	other
ADAM12	-2.081	7.13e-28	-3.042	4.64e-125	Plasma Membrane	peptidase
BTBD6	-2.086	1.05e-06	-2.441	4.45e-11	unknown	other
ADAMTS20	-2.087	0.000293	-2.205	2.04e-08	Extracellular Space	peptidase
SLIT3	-2.096	1.07e-76	-2.894	1.74e-197	Extracellular Space	other
NKD2	-2.096	0.000211	-3.708	4.33e-16	Nucleus	other
MYO10	-2.097	5.18e-81	-2.363	1.35e-220	Cytoplasm	other
C1S	-2.106	1.75e-111	-4.211	1.55e-288	Extracellular Space	peptidase
SNCAIP	-2.11	4.32e-11	-2.022	9.43e-23	Cytoplasm	transcription regulator
GAS1	-2.111	2.19e-144	-2.96	0	Plasma Membrane	other
TMEM176B	-2.114	1.04e-90	-2.194	5.23e-198	unknown	other
CPXM1	-2.114	1.47e-42	-3.553	1.64e-269	Extracellular Space	peptidase
SMTNL2	-2.121	5.7e-14	-3.121	2.33e-33	unknown	other
ELN	-2.121	9.92e-27	-6.241	1.29e-290	Extracellular Space	other
WBSCR17	-2.122	1.62e-07	-2.848	4.19e-19	Cytoplasm	enzyme
DCN	-2.124	4.72e-55	-3.661	0	Extracellular Space	other
FOLR1	-2.144	1.06e-42	-2.245	1.44e-119	Plasma Membrane	transporter
CLU	-2.147	3.47e-18	-4.046	7.35e-134	Extracellular Space	other
BICD1	-2.149	3.43e-08	-2.231	2.3e-17	Cytoplasm	other
EML6	-2.157	4.05e-06	-2.051	3.55e-08	unknown	other
FUOM	-2.17	1.69e-19	-2.008	2.3e-50	unknown	enzyme
GSTM5	-2.17	6.72e-29	-2.35	7.69e-74	Cytoplasm	enzyme
PODXL	-2.17	0.000729	-2.749	5.55e-07	Plasma Membrane	kinase
RBM47	-2.17	0.000729	-3.915	1.69e-16	unknown	other
OLFML3	-2.173	3.41e-14	-3.368	2.17e-61	Extracellular Space	other
KLHL29	-2.182	5.82e-07	-2.567	3.26e-16	unknown	other
NOS1AP	-2.182	4.73e-05	-2.731	1.95e-08	Cytoplasm	other
RAI14	-2.204	1.61e-138	-2.108	1.93e-275	Nucleus	transcription regulator
Sprr3	-2.206	6.3e-17	-3.716	4.61e-45	Cytoplasm	other
NDRG1	-2.212	1.55e-78	-3.414	0	Nucleus	kinase
SEMA3D	-2.228	1.06e-96	-2.255	6.35e-277	Extracellular Space	other
Mir546	-2.236	1.38e-05	-4.931	1.56e-15	Cytoplasm	microRNA
BC039771	-2.241	0.000291	-2.726	2.47e-20	unknown	other
PHOX2A	-2.246	5.17e-06	-2.797	1.44e-25	Nucleus	transcription regulator
CCDC8	-2.246	0.000209	-4.327	4.77e-12	Plasma Membrane	other
COLEC12	-2.25	2.16e-57	-2.535	7.33e-134	Plasma Membrane	transmembrane receptor
EZR	-2.261	0	-2.454	0	Plasma Membrane	other
SFRP2	-2.262	3.39e-50	-3.413	7.01e-252	Plasma Membrane	transmembrane receptor
IGFBP5	-2.262	5.54e-05	-4.636	0.000105	Extracellular Space	other
ZBTB8B	-2.294	8.88e-29	-2.882	1.72e-80	Nucleus	other
CNKSR3	-2.294	2.97e-27	-3.335	6.04e-104	Plasma Membrane	other
GNAI1	-2.296	3.22e-11	-2.976	2.57e-30	Plasma Membrane	enzyme
RAB6B	-2.297	5.97e-10	-5.397	1.62e-51	Cytoplasm	enzyme
Speer4a (includes others)	-2.299	0.000313	-2.744	3.61e-06	Nucleus	other
GPNMB	-2.305	1.23e-22	-2.997	2.32e-72	Plasma Membrane	enzyme
A730049H05Rik	-2.307	8.48e-10	-2.19	1.25e-14	unknown	other
MYLK	-2.319	2.93e-37	-2.769	3.76e-144	Cytoplasm	kinase
SRRM4	-2.326	1.84e-11	-3.672	1.59e-57	Nucleus	other
FGF2	-2.329	1.71e-09	-5.995	2.09e-81	Extracellular Space	growth factor
SMAD9	-2.33	0.000453	-4.45	4.12e-20	Nucleus	transcription regulator
PPP1R9A	-2.334	0.000166	-2.358	2.5e-07	Plasma Membrane	other
HEG1	-2.334	1.23e-91	-2.689	3.47e-138	Plasma Membrane	other
ADAMTS14	-2.342	1.63e-05	-3.729	1.56e-18	Extracellular Space	peptidase
CCDC141	-2.348	2.83e-12	-3.161	1.65e-42	unknown	other
CCDC19	-2.367	8.75e-05	-2.605	1.73e-08	unknown	other
Neat1	-2.393	2.77e-10	-3.877	1.89e-46	Nucleus	other
Sprr1a	-2.395	1.25e-17	-2.136	1.38e-48	Cytoplasm	other
AIG1	-2.396	2.38e-05	-2.954	2.7e-11	unknown	other
SCARB2	-2.397	0	-3.081	0	Plasma Membrane	other
MTSS1	-2.399	2.67e-26	-3.415	1.67e-141	Cytoplasm	other
H6PD	-2.402	4.52e-80	-4.468	0	Cytoplasm	enzyme
SELENBP1	-2.403	0.000175	-2.781	0.000283	Cytoplasm	other
ME3	-2.403	4.11e-11	-2.906	6.01e-31	Cytoplasm	enzyme
MMP16	-2.407	3e-27	-2.183	4.06e-56	Extracellular Space	peptidase
C3	-2.416	4.51e-60	-3.733	5.47e-175	Extracellular Space	peptidase
DPEP1	-2.417	4.68e-06	-2.029	1.08e-05	Cytoplasm	peptidase
FAM180A	-2.433	1.53e-42	-2.492	7.67e-197	unknown	other
FOXP2	-2.441	3.43e-06	-3.206	9.73e-18	Nucleus	transcription regulator
HLA-DQB1	-2.445	4.47e-49	-4.051	2.11e-246	Plasma Membrane	other
NLRC3	-2.451	5.85e-26	-2.615	1.78e-82	Cytoplasm	other
PCDH9	-2.454	9.4e-17	-3.266	1e-50	Plasma Membrane	other
FAM184A	-2.457	5.85e-15	-2.587	2.01e-34	Extracellular Space	other
KALRN	-2.457	8.13e-81	-3.022	7.66e-173	Cytoplasm	kinase
PEG3	-2.46	7.99e-54	-2.808	2.23e-108	Nucleus	kinase
STAP2	-2.462	3.9e-09	-2.69	6.74e-20	Cytoplasm	other
ZNF467	-2.469	3.48e-06	-3.433	6.2e-22	Nucleus	other
CFH	-2.47	6.15e-42	-2.701	6.41e-167	Extracellular Space	other
E130102H24Rik	-2.486	0.000181	-3.41	4.57e-20	unknown	other
KCNT1	-2.492	1.61e-10	-2.308	9.01e-19	Plasma Membrane	ion channel
Cfhr2/Cfhr3	-2.507	0.000495	-2.755	3.4e-08	unknown	other
KANK4	-2.515	1.33e-06	-3.013	5.73e-13	Cytoplasm	other
HOXB4	-2.565	4.6e-11	-3.968	1.32e-33	Nucleus	transcription regulator
SERPINA3	-2.569	1.27e-15	-5.224	2.96e-140	Extracellular Space	other
EPS8	-2.576	5.49e-72	-2.941	4.52e-201	Plasma Membrane	peptidase
SLC43A3	-2.58	1.36e-218	-2.643	0	Extracellular Space	other
LDOC1L	-2.588	1.17e-14	-2.608	6.7e-25	unknown	other
SEMA5A	-2.606	2.66e-07	-3.725	1.17e-22	Plasma Membrane	transmembrane receptor
ART3	-2.618	2.54e-05	-3.752	5.66e-18	Plasma Membrane	enzyme
N4BP2L1	-2.63	5.28e-08	-2.242	3.07e-23	unknown	other
CNRIP1	-2.63	9.5e-06	-2.818	1.08e-11	unknown	other
Gm2895	-2.638	2.17e-14	-4.103	7.78e-114	unknown	other
ACVR1B	-2.644	2.54e-16	-3.509	3.63e-57	Plasma Membrane	kinase
BACE2	-2.658	6.8e-05	-2.864	5.04e-11	Cytoplasm	peptidase
LPAR1	-2.669	1.86e-85	-2.102	6.97e-147	Plasma Membrane	G-protein coupled receptor
IL1RL2	-2.678	9.94e-08	-6.717	6.04e-58	Plasma Membrane	transmembrane receptor
FMOD	-2.683	4.94e-182	-2.55	0	Extracellular Space	other
ITGA7	-2.691	4.67e-65	-3.283	5.05e-147	Plasma Membrane	other
MT1H	-2.743	1.42e-18	-2.917	8.68e-121	unknown	other
TNIK	-2.744	8.12e-20	-2.348	2.68e-34	Cytoplasm	kinase
NEU3	-2.746	1.21e-31	-3.01	2.24e-85	Plasma Membrane	enzyme
NID2	-2.746	0	-3.18	0	Extracellular Space	other
XDH	-2.772	2.9e-81	-4.606	0	Cytoplasm	enzyme
SLC39A4	-2.799	3.74e-15	-3.09	6.09e-35	Plasma Membrane	transporter
NPR1	-2.808	2.07e-43	-2.877	5.61e-91	Plasma Membrane	enzyme
NXPH1	-2.811	3.76e-24	-2.798	8.39e-90	Extracellular Space	other
TF	-2.834	2.07e-73	-2.476	2.32e-132	Extracellular Space	transporter
SLFN13	-2.847	8.1e-13	-5.488	2.64e-58	Nucleus	enzyme
TMEM221	-2.861	6.47e-05	-2.17	4.01e-06	unknown	other
SPRR2G	-2.87	2.36e-06	-4.593	1.39e-74	Cytoplasm	other
FAM110C	-2.875	4.87e-65	-2.581	1.61e-121	unknown	other
ID2	-2.875	2.38e-33	-4.558	4.02e-292	Nucleus	transcription regulator
PRPH	-2.91	1.74e-16	-7.269	1.25e-61	Plasma Membrane	other
RGS3	-2.924	1.93e-46	-3.44	1.85e-133	Nucleus	other
PCDHB16	-2.937	1.19e-05	-3.485	5.27e-11	Plasma Membrane	other
AUTS2	-2.988	1.2e-30	-5.665	1.01e-155	Extracellular Space	other
IGFBP4	-2.996	1.16e-83	-5.516	0	Extracellular Space	other
ALCAM	-3.012	2.56e-225	-2.342	0	Plasma Membrane	other
CISH	-3.053	2.05e-27	-2.529	5.75e-42	Cytoplasm	other
FIGF	-3.054	1.36e-55	-2.74	1.62e-120	Extracellular Space	growth factor
THRB	-3.054	2.06e-07	-3.602	3.49e-32	Nucleus	ligand-dependent nuclear receptor
MTUS2	-3.058	3.34e-16	-6.212	7.41e-105	Cytoplasm	other
ATP1B1	-3.103	0	-5.53	0	Plasma Membrane	transporter
SEPP1	-3.113	1.53e-16	-10.415	8.84e-123	Extracellular Space	other
IDUA	-3.132	2.6e-10	-2.552	2.65e-16	Cytoplasm	enzyme
GJB4	-3.156	0.000111	-2.483	1.63e-05	Plasma Membrane	transporter
TCF21	-3.171	1.63e-151	-3.618	0	Nucleus	transcription regulator
DPP4	-3.205	1.72e-63	-4.377	2e-172	Plasma Membrane	peptidase
RIMS1	-3.209	1.01e-05	-2.132	3.53e-05	Plasma Membrane	other
Gm19557	-3.209	1.01e-05	-2.463	5.11e-06	unknown	other
GAS7	-3.225	3.32e-08	-4.291	6.79e-19	Cytoplasm	transcription regulator
ECSCR	-3.232	1.82e-26	-2.504	2.39e-35	unknown	other
TGFBR3	-3.268	2.12e-44	-4.987	1.98e-227	Plasma Membrane	kinase
RGS16	-3.277	1.6e-31	-3.804	6.84e-59	Cytoplasm	other
RASL11A	-3.31	2.96e-64	-3.135	2.09e-250	Nucleus	other
KLHL30	-3.326	2.08e-51	-4.808	4.76e-175	unknown	other
LRRN4	-3.344	1.61e-162	-7.626	0	unknown	other
5430435G22Rik	-3.367	3.25e-06	-2.421	6.58e-09	Cytoplasm	peptidase
Nup62cl	-3.382	1.3e-10	-3.255	7.28e-15	unknown	other
ISLR	-3.393	0.00014	-5.099	1.58e-09	Extracellular Space	other
PCDH10	-3.4	1.54e-46	-4.097	1.19e-107	Plasma Membrane	other
SYNPO2	-3.413	7.64e-15	-3.874	2.76e-40	Cytoplasm	other
BMF	-3.42	0.000277	-6.181	1.87e-15	Cytoplasm	other
AVPR1A	-3.428	1.29e-41	-3.097	3.37e-84	Plasma Membrane	G-protein coupled receptor
EMILIN1	-3.431	8.23e-57	-7.374	1.08e-186	Extracellular Space	other
HMCN1	-3.443	4.81e-05	-3.316	3.88e-09	Extracellular Space	other
MFAP2	-3.491	2.8e-31	-2.524	6.33e-40	Extracellular Space	other
MSRB2	-3.515	3.13e-09	-2.586	7.31e-11	Nucleus	transcription regulator
ST3GAL1	-3.573	5.45e-21	-5.506	0	Cytoplasm	enzyme
APOE	-3.574	7.7e-131	-6.598	0	Extracellular Space	transporter
UCP2	-3.582	0	-5.232	0	Cytoplasm	transporter
Gsta4	-3.634	2.51e-32	-2.265	1.96e-23	Cytoplasm	enzyme
SVEP1	-3.643	2.27e-55	-4.197	7.96e-136	Cytoplasm	other
IL4R	-3.732	4.15e-127	-4.406	1.24e-290	Plasma Membrane	transmembrane receptor
BC023719	-3.735	2.12e-07	-6.119	1.82e-24	unknown	other
CMYA5	-3.748	3.42e-06	-3.835	3.04e-10	Plasma Membrane	other
RAB27B	-3.755	3.01e-13	-4.018	2.54e-38	Cytoplasm	enzyme
CPQ	-3.756	1.82e-23	-2.787	1.17e-35	Extracellular Space	peptidase
SLC2A13	-3.788	1.93e-05	-2.822	4.32e-06	Plasma Membrane	transporter
GLI1	-3.84	9.51e-08	-2.856	5.05e-12	Nucleus	transcription regulator
SMOC2	-3.866	3.22e-31	-7.513	8.96e-99	Extracellular Space	other
IVL	-3.881	5.12e-60	-4.723	2.37e-171	Cytoplasm	other
FADS6	-4.067	1.55e-07	-4.918	4.14e-16	unknown	enzyme
PGAM2	-4.077	5.29e-10	-3.583	4.31e-22	Cytoplasm	phosphatase
Gm10389	-4.08	7.66e-27	-3.708	2.41e-49	unknown	other
RORC	-4.103	1.24e-08	-6.153	4.23e-32	Nucleus	ligand-dependent nuclear receptor
DAAM2	-4.149	4.42e-34	-5.474	1.66e-120	unknown	other
PRR15	-4.209	3.72e-15	-7.869	4.42e-107	unknown	other
PPP2R2B	-4.241	1.51e-38	-5.11	7.14e-121	Cytoplasm	phosphatase
H2-Q10	-4.283	3.72E-311	-9.193	0	unknown	other
A930024E05Rik	-4.34	0.000183	-2.909	8.21e-08	unknown	other
KIAA1244	-4.376	2.42e-07	-2.389	8.29e-05	Cytoplasm	other
ID3	-4.437	0	-3.551	0	Nucleus	transcription regulator
TNC	-4.496	0	-6.875	0	Extracellular Space	other
HLX	-4.559	1.31e-06	-7.988	1.84e-19	Nucleus	transcription regulator
SFRP1	-4.563	7.48e-112	-6.436	4.51e-308	Plasma Membrane	transmembrane receptor
CACNA1A	-4.591	3.93e-21	-4.224	1.45e-40	Plasma Membrane	ion channel
UNC5A	-4.603	1.53e-08	-4.684	1.55e-12	Plasma Membrane	transmembrane receptor
DOCK10	-4.603	7.73e-05	-16.503	7.24e-20	unknown	other
MMP3	-4.62	7.98e-39	-10.919	0	Extracellular Space	peptidase
OTUD7A	-4.622	1.71e-05	-3.109	1.01e-05	Cytoplasm	other
ANKRD65	-4.735	0.000228	-2.695	2.54e-09	unknown	other
8030451A03Rik	-4.758	5.25e-44	-12.98	0.000875	unknown	other
STAC	-4.772	7.64e-15	-3.598	2.81e-22	Cytoplasm	other
GGT5	-4.831	6.52e-55	-5.859	6.24e-122	Plasma Membrane	enzyme
TNNT2	-4.891	0	-3.823	0	Cytoplasm	other
EHD3	-4.907	4.6e-203	-7.373	0	Cytoplasm	other
PDZD2	-4.926	9.88e-143	-30.595	7.14e-09	Plasma Membrane	other
OLR1	-4.96	5.89e-11	-3.328	3.99e-13	Plasma Membrane	transmembrane receptor
ID1	-4.994	0	-3.418	0	Nucleus	transcription regulator
PLEK	-5.073	2.93e-06	-4.172	6.58e-10	Cytoplasm	other
HDDC3	-5.212	1.8e-33	-5.704	8.96e-77	unknown	other
HOXB3	-5.24	3.13e-20	-6	1.13e-48	Nucleus	transcription regulator
AMDHD1	-5.376	5.79e-14	-9.348	2.96e-43	Cytoplasm	enzyme
SEMA6D	-5.603	9.27e-10	-7.675	5.54e-25	Plasma Membrane	other
HAL	-5.628	2.5e-46	-5.78	1.26e-122	Cytoplasm	enzyme
ATOH8	-5.63	1.65e-45	-8.588	9.15e-154	unknown	other
IGLON5	-5.712	1.15e-19	-7.082	3.97e-43	unknown	other
CNTNAP3	-5.721	2.78e-08	-2.092	7.46e-05	Extracellular Space	other
Clca1/Clca2	-5.759	0	-5.776	0	Plasma Membrane	ion channel
CFI	-5.787	2.55e-09	-9.518	3.05e-28	Extracellular Space	peptidase
PRSS12	-5.845	8.58e-26	-5.031	1.63e-46	Extracellular Space	peptidase
PDE2A	-5.875	1.61e-09	-6.544	2.8e-36	Cytoplasm	enzyme
LRTM2	-6.116	4.3e-05	-4.371	6.95e-05	unknown	other
Gbp6 (includes others)	-6.116	4.3e-05	-4.85	1.8e-09	Cytoplasm	other
TGFBI	-6.225	2.17e-19	-30.205	5.45e-147	Extracellular Space	other
CADM1	-6.275	2.15e-126	-6.285	0	Plasma Membrane	other
Lipo1 (includes others)	-6.313	0.000315	-3.832	2.23e-07	unknown	other
PDGFRA	-6.474	1.93e-53	-15.732	0	Plasma Membrane	kinase
SOD3	-6.51	5.28e-40	-4.825	1.67e-79	Extracellular Space	enzyme
Serpina3k (includes others)	-7.102	3.95e-06	-9.404	1.18e-13	Extracellular Space	other
STEAP4	-7.215	4.17e-10	-35.652	2.42e-103	Plasma Membrane	other
MEGF6	-7.252	4.85e-227	-10.211	0	Cytoplasm	other
C2orf40	-7.277	8.4e-13	-4.38	1.86e-31	Extracellular Space	other
PNMAL2	-7.299	2.43e-06	-36.158	4.79e-20	unknown	other
SAA2	-7.365	4.57e-05	-50.76	2.33e-56	Extracellular Space	other
Cyp2d22	-7.384	1.31e-19	-9.546	6.97e-50	Cytoplasm	enzyme
SCG2	-7.497	0.000898	-5.563	1.25e-07	Extracellular Space	cytokine
mir-101	-7.497	0.000898	-7.108	0.000108	Cytoplasm	microRNA
SEZ6L	-7.497	0.000898	-7.417	3.19e-06	Plasma Membrane	other
CCDC68	-7.654	4.3e-15	-5.424	1.23e-31	unknown	other
Clca4	-7.743	4.3e-46	-5.224	8.73e-177	unknown	ion channel
HLA-B	-7.758	1.3e-224	-20.485	0	Plasma Membrane	transmembrane receptor
SYT8	-7.891	0.000546	-3.637	5e-06	Cytoplasm	transporter
PLAC8	-7.891	0.000546	-6.799	0.000186	Nucleus	other
TEK	-7.94	1.34e-24	-11.237	1.31e-57	Plasma Membrane	kinase
ITGBL1	-7.963	1.94e-33	-5.259	8.11e-41	unknown	other
ANGPTL7	-8.077	6.36e-52	-22.495	0	Extracellular Space	other
SMPDL3A	-8.207	7.04e-09	-3.996	4.64e-14	Extracellular Space	enzyme
S100A4	-8.381	0	-3.285	0	Cytoplasm	other
SLC13A4	-8.417	6.32e-06	-3.477	0.000699	Plasma Membrane	transporter
2410137M14Rik	-8.68	0.000201	-67.68	6.04e-20	unknown	other
HOXB2	-9.131	3.13e-26	-5.679	4.84e-34	Nucleus	transcription regulator
WDR86	-9.469	7.27e-05	-5.717	3.11e-06	unknown	other
SDK1	-9.667	6.18e-09	-5.47	5.12e-09	Plasma Membrane	other
GPR88	-9.995	3.04e-07	-12.609	1.27e-27	Plasma Membrane	G-protein coupled receptor
STBD1	-10.046	7.61e-234	-10.249	0	Cytoplasm	other
TMEM215	-10.061	1.33e-17	-20.611	8.29e-65	unknown	other
ADAMTSL2	-10.062	0	-4.653	0	unknown	other
A630023A22Rik	-10.101	1.69e-11	-3.352	2.63e-13	unknown	other
KIAA1324L	-10.437	1.3e-67	-14.704	1.19e-183	unknown	other
PCDH17	-11.048	2.85e-98	-16.866	5.25e-298	unknown	other
ADAM23	-11.442	5.52e-06	-4.973	1.62e-08	Plasma Membrane	peptidase
2610507I01Rik	-12.1	4.87e-09	-10.507	7.54e-20	unknown	other
GUCY1A3	-12.171	1.02e-69	-26.135	9.06e-241	Cytoplasm	enzyme
PYCARD	-12.31	1.23e-14	-7.53	1.58e-53	Cytoplasm	transcription regulator
REC8	-12.626	1.71e-09	-24.847	7.71e-32	Nucleus	other
GBP2	-16.966	2.25e-17	-55.318	1.19e-46	Nucleus	other
AIF1	-17.361	1.9e-09	-11.435	3.85e-08	Nucleus	other
SLC16A2	-18.15	2e-05	-10.43	2.12e-09	Plasma Membrane	transporter
HSD11B1	-18.15	2e-05	-26.887	1.36e-14	Cytoplasm	enzyme
ZFHX4	-18.939	1.16e-05	-65.826	2.19e-19	Extracellular Space	other
INPP5D	-20.044	5.18e-26	-12.13	3.43e-61	Cytoplasm	phosphatase
PNLDC1	-21.503	8.57e-23	-11.396	2.13e-56	unknown	other
CLDN15	-21.622	2.22e-28	-9.827	1.86e-85	Plasma Membrane	other
2410017I17Rik	-22.095	2.35e-212	-6.692	2.77e-127	unknown	other
Serpinb6b	-26.304	2.58e-42	-40.237	7.39e-214	unknown	other
MGP	-57.852	0	-26.772	0	Extracellular Space	other
